# Supplementary material
Source: PubMed Central journal article supplement (PMC6740147)
Supplement: PRO-28-1850-s001.pdf [file PRO-28-1850-s001.pdf]

# **Geometric considerations support the double-displacement catalytic mechanism of L-asparaginase**

Jacek Lubkowski\* and Alexander Wlodawer

## Supplementary Material

**Table S1.** Equivalent residues in the active sites of L-asparaginases from different organisms

|                                                |       |        |        |        |        |
|------------------------------------------------|-------|--------|--------|--------|--------|
| <b>EcAII</b>                                   | Thr12 | Tyr25  | Thr89  | Asp90  | Lys162 |
| <b>ErA</b>                                     | Thr15 | Tyr29  | Thr95  | Asp96  | Lys168 |
| <i>W. succinogenes</i>                         | Thr14 | Tyr27  | Thr93  | Asp94  | Lys166 |
| <b>Guinea pig (AB)<sup>&amp;</sup></b>         | Thr19 | Tyr308 | Thr116 | Asp117 | Lys188 |
| <i>H. pylori</i>                               | Thr16 | Tyr29  | Thr95  | Asp96  | Lys168 |
| <b><i>P. furiosus</i> (AB)<sup>&amp;</sup></b> | Thr11 | Tyr273 | Thr83  | Asp84  | Lys154 |

<sup>&</sup>In these enzymes the active site tyrosine residue is contributed by another monomer

**Table S2.** Details of the crystallization conditions for structures determined in this study

| <b>Structure</b>                         | <b>Crystallization and Freezing Conditions</b>                                                                                                                                                    |
|------------------------------------------|---------------------------------------------------------------------------------------------------------------------------------------------------------------------------------------------------|
| EcAII <sup>wt</sup> <sub>1</sub>         | 0.17 M NH <sub>4</sub> -citrate, pH 7, 17-18% PEG3350, 30 mM L-Asp<br>(co-crystallization)<br>Flash-freezing in mother liquid but PEG3350 content increased to 38%                                |
| EcAII <sup>wt</sup> <sub>2</sub>         | 0.17 M NH <sub>4</sub> -citrate, pH 5.6, 17-18% PEG3350<br>(1 min soaking in solution with 5 mM L-Asp)<br>Flash-freezing in mother liquid but PEG3350 content increased to 38%                    |
| EcAII <sup>T12V</sup> <sub>1</sub>       | 0.17 M NH <sub>4</sub> -citrate, pH 5.5, 17-18% PEG3350, 5 mM L-Asp<br>(co-crystallization)<br>Flash-freezing in mother liquid enriched with 25% (v/v) glycerol                                   |
| EcAII <sup>T12V</sup> <sub>2</sub>       | 0.17 M NH <sub>4</sub> -citrate, pH 7.0, 17-18% PEG3350, 5 mM L-Asp<br>(co-crystallization)<br>Flash-freezing in mother liquid enriched with 25% (v/v) glycerol                                   |
| EcAII <sup>T89V/K162T</sup> <sub>1</sub> | 0.17 M NH <sub>4</sub> -citrate, pH 7.0, 17-18% PEG3350, 10 mM L-Asn<br>(co-crystallization)<br>Flash-freezing in mother liquid but PEG3350 content increased to 38%                              |
| EcAII <sup>T89V/K162T</sup> <sub>2</sub> | 0.17 M NH <sub>4</sub> -citrate, pH 7.0, 17-18% PEG3350<br>(1 min soaking in solution with 0.5 mM L-Asn)<br>Flash-freezing in mother liquid but PEG3350 content increased to 38%                  |
| EcAII <sup>T89V/K162T</sup> <sub>3</sub> | 0.17 M NH <sub>4</sub> -citrate, pH 7.0, 17-18% PEG3350, 5 mM L-Asp<br>(co-crystallization)<br>Flash-freezing in mother liquid but PEG3350 content increased to 38%                               |
| EcAII <sup>T89V/K162T</sup> <sub>4</sub> | 0.17 M NH <sub>4</sub> -citrate, pH 7.0, 17-18% PEG3350<br>Transfer to 0.1 M Tris, pH 8.3, 19-20% PEG3350 with 5 mM L-Asn<br>Flash-freezing in mother liquid but PEG3350 content increased to 38% |
| EcAII <sup>T89V/K162T</sup> <sub>5</sub> | 0.17 M NH <sub>4</sub> -citrate, pH 7.0, 17-18% PEG3350<br>Transfer to 0.1 M Tris, pH 8.3, 19-20% PEG3350 with 5 mM L-Asn<br>Flash-freezing in mother liquid but PEG3350 content increased to 38% |
| EcAII <sup>K162M</sup> <sub>1</sub>      | 0.17 M NH <sub>4</sub> -citrate, pH 5.6, 17-18% PEG3350, 10 mM L-Asp<br>(co-crystallization)<br>Flash-freezing in mother liquid enriched with 25% (v/v) glycerol                                  |
| EcAII <sup>K162M</sup> <sub>2</sub>      | 0.17 M NH <sub>4</sub> -citrate, pH 5.6, 17-18% PEG3350, 10 mM L-Asp<br>(co-crystallization)<br>Flash-freezing in mother liquid but PEG3350 content increased to 38%                              |
| ErA                                      | Described in ref. <sup>32</sup>                                                                                                                                                                   |
